# Supplementary material
Source: bioRxiv or medRxiv preprint supplement (https://www.biorxiv.org/highwire/filestream/79748/field_highwire_adjunct_files/2/260216-3.pdf)
Supplement: Supplementary file [file 260216-3.pdf]

| Species                                                                                                                     | Mass<br>(mmol) | Carbon<br>mass<br>(mmol) | Carbon<br>distributio<br>n (%) | Electron<br>mass<br>(mmol) | Electron<br>distribution<br>(%) |
|-----------------------------------------------------------------------------------------------------------------------------|----------------|--------------------------|--------------------------------|----------------------------|---------------------------------|
| <b>Substrate</b>                                                                                                            |                |                          |                                |                            |                                 |
| Glucose (C <sub>6</sub> H <sub>12</sub> O <sub>6</sub> ) <sup>a</sup>                                                       | 14.46          | 86.76                    |                                | 347.04                     |                                 |
| <b>Products</b>                                                                                                             |                |                          |                                |                            |                                 |
| Acetate (C <sub>2</sub> H <sub>3</sub> O <sub>2</sub> <sup>-</sup> )                                                        | 4.86           | 9.73                     | 11.6                           | 38.92                      | 10.5                            |
| Butyrate (C <sub>4</sub> H <sub>7</sub> O <sub>2</sub> <sup>-</sup> )                                                       | 8.31           | 33.24                    | 39.5                           | 166.19                     | 44.9                            |
| Hydrogen (H <sub>2</sub> )                                                                                                  | 24.48          | -                        | -                              | 48.97                      | 13.2                            |
| Carbon dioxide (CO <sub>2</sub> ) <sup>b</sup>                                                                              | 21.2           | 21.2                     | 25.2                           | -                          | -                               |
| Biomass<br>(CH <sub>1.624</sub> O <sub>0.456</sub> N <sub>0.216</sub> P <sub>0.033</sub> S <sub>0.0047</sub> ) <sup>c</sup> | 19.87          | 19.87                    | 23.6                           | 115.65                     | 31.3                            |
| Total Carbon mass                                                                                                           |                | 84.04                    |                                |                            |                                 |
| Total Electron mass                                                                                                         |                |                          |                                | 369.72                     |                                 |
| Carbon and electron<br>recovery (%)                                                                                         |                | 96.87                    |                                | 106.54                     |                                 |

<sup>a</sup> Fermented glucose = (Initial glucose - residual glucose)

<sup>b</sup> CO<sub>2</sub> in the liquid phase was ignored.

<sup>c</sup> P in biomass formula ignored

**Table S2. Carbon and electron recoveries from anaerobic phase in one-put batch cultivation.**

The carbon and electron masses (mmol) and distribution (%) of *C. butyricum* biomass, gaseous and liquid metabolites generated from glucose in 1-L bioreactor are presented.
